# Supplementary material for: Efficacy and Safety of Modified Yunu-Jian in Patients with Periodontitis: A Meta-Analysis
Source: Evid Based Complement Alternat Med. 2021 Apr 23;2021:5147439. doi: 10.1155/2021/5147439 (PMC8093059; doi:10.1155/2021/5147439)
Supplement: Supplementary Materials — S1: retrieval strategy for PubMed and CNKI. S2: PRISMA checklist. S3: Harbord's test for clinical efficiency. S4: the trim-and-fill method for funnel plot of total effective rate. [file 5147439.f1.zip]

Archive with 4 entries (4 files):
- 5147439.f1/S1-Retrieval strategy for PubMed and CNKI.doc
- 5147439.f1/S2-PRISMA checklist.doc
- 5147439.f1/S3-Harbord's test for clinical efficiency.doc
- 5147439.f1/S4-The trim and fill method for funnel plot of total effective rate (1).doc
